# Supplementary material for: Temporal regulation of cell polarity via the interaction of the Ras GTPase Rsr1 and the scaffold protein Bem1
Source: PubMed Central journal article supplement — Mol Biol Cell. 2019 Sep 15;30(20):2543–57. doi: 10.1091/mbc.E19-02-0106 (PMC6740199; doi:10.1091/mbc.e19-02-0106), 2019-09-15
Supplement: mbc-30-2543-s001.pdf [file mbc-30-2543-s001.pdf]

# Supplemental Materials

*Molecular Biology of the Cell*

Miller et al.

**Table S1. Yeast strains used in this study**

| Strain  | Relevant Genotype <sup>a</sup>                                                                                                                            | Source/Comments            |
|---------|-----------------------------------------------------------------------------------------------------------------------------------------------------------|----------------------------|
| YEF473A | <b>a</b> <i>his3-Δ200 leu2-Δ1 lys2-801 trp1-Δ63 ura3-52</i>                                                                                               | Bi and Pringle, 1996       |
| HPY1197 | <b>a</b> <i>VC-CDC42-KAN</i>                                                                                                                              | Kang <i>et al.</i> , 2010  |
| HPY1213 | <b>a</b> <i>YFPC-RSR1-TRP1</i>                                                                                                                            | Kang <i>et al.</i> , 2010  |
| HPY1522 | <b>a</b> <i>YFPC-rsr1<sup>K16N</sup>-TRP1</i>                                                                                                             | Kang <i>et al.</i> , 2010  |
| HPY1552 | <b>a</b> <i>YFPC-rsr1<sup>G12V</sup>-TRP1</i>                                                                                                             | Kang <i>et al.</i> , 2010  |
| HPY3340 | <b>a</b> <i>VC-CDC42-KAN BEM1-YFP<sup>N</sup>-URA3</i>                                                                                                    | This Study <sup>b</sup>    |
| HPY3441 | <b>a</b> <i>YFPC-RSR1-TRP1 BEM1-YFP<sup>N</sup>-URA3</i>                                                                                                  | This Study <sup>b</sup>    |
| HPY3442 | <b>a</b> <i>YFPC-rsr1<sup>K16N</sup>-TRP1 BEM1-YFP<sup>N</sup>-URA3</i>                                                                                   | This Study <sup>b</sup>    |
| HPY3443 | <b>a</b> <i>YFPC-rsr1<sup>G12V</sup>-TRP1 BEM1-YFP<sup>N</sup>-URA3</i>                                                                                   | This Study <sup>b</sup>    |
| HPY3444 | <b>a</b> <i>VC-CDC42-KAN bem1<sup>Δ281-345</sup>-YFP<sup>N</sup>-URA3</i>                                                                                 | This Study <sup>b</sup>    |
| HPY3445 | <b>a</b> <i>YFPC-RSR1-TRP1 bem1<sup>Δ281-345</sup>-YFP<sup>N</sup>-URA3</i>                                                                               | This Study <sup>b</sup>    |
| HPY3446 | <b>a</b> <i>YFPC-rsr1<sup>K16N</sup>-TRP1 bem1<sup>Δ281-345</sup>-YFP<sup>N</sup>-URA3</i>                                                                | This Study <sup>b</sup>    |
| HPY3447 | <b>a</b> <i>YFPC-rsr1<sup>G12V</sup>-TRP1 bem1<sup>Δ281-345</sup>-YFP<sup>N</sup>-URA3</i>                                                                | This Study <sup>b</sup>    |
| HPY3448 | <b>a</b> <i>VC-CDC42-KAN bem1<sup>Δ345-408</sup>-YFP<sup>N</sup>-URA3</i>                                                                                 | This Study <sup>b</sup>    |
| HPY3449 | <b>a</b> <i>YFPC-RSR1-TRP1 bem1<sup>Δ345-408</sup>-YFP<sup>N</sup>-URA3</i>                                                                               | This Study <sup>b</sup>    |
| HPY3450 | <b>a</b> <i>YFPC-rsr1<sup>K16N</sup>-TRP1 bem1<sup>Δ345-408</sup>-YFP<sup>N</sup>-URA3</i>                                                                | This Study <sup>b</sup>    |
| HPY3451 | <b>a</b> <i>YFPC-rsr1<sup>G12V</sup>-TRP1 bem1<sup>Δ345-408</sup>-YFP<sup>N</sup>-URA3</i>                                                                | This Study <sup>b</sup>    |
| HPY2671 | $\alpha$ <i>WHI5-GFP-TRP1 PBD-tdTomato-URA3</i>                                                                                                           | Lee <i>et al.</i> , 2015   |
| HPY2669 | $\alpha$ <i>rsr1Δ::URA3 WHI5-GFP-KAN PBD-tdTomato-URA3</i>                                                                                                | Lee <i>et al.</i> , 2015   |
| HPY3296 | <b>a</b> <i>BEM1-GFP-LEU2 WHI5-mCherry-hph</i>                                                                                                            | This Study <sup>c</sup>    |
| HPY3300 | <b>a</b> <i>rsr1Δ::TRP1 BEM1-GFP-LEU2 WHI5-mCherry-hph</i>                                                                                                | This Study <sup>c</sup>    |
| HPY3218 | $\alpha$ <i>rsr1Δ::URA3 rsr1<sup>K16N</sup>-TRP1 WHI5-GFP-KAN PBD-tdTomato-URA3</i>                                                                       | This Study <sup>d, e</sup> |
| HPY3190 | <b>a/α</b> <i>WHI5-GFP-KAN/ WHI5-GFP-KAN PBD-tdTomato-URA3/ PBD-tdTomato-URA3</i>                                                                         | This Study <sup>d</sup>    |
| HPY3259 | <b>a/α</b> <i>rsr1Δ::URA3/rsr1Δ::URA3 rsr1<sup>K16N</sup>-TRP1/rsr1<sup>K16N</sup>-TRP1 WHI5-GFP-KAN/WHI5-GFP-KAN PBD-tdTomato-URA3/PBD-tdTomato-URA3</i> | This Study <sup>d, e</sup> |

|          |                                                                                                                                                             |                            |
|----------|-------------------------------------------------------------------------------------------------------------------------------------------------------------|----------------------------|
| HPY3331  | <b>a/α</b> <i>rsr1Δ::URA3/rsr1Δ::URA3 WHI5-GFP-KAN/WHI5-GFP-KAN PBD-tdTomato-URA3/PBD-tdTomato-URA3</i>                                                     | This Study <sup>d</sup>    |
| DLY9875  | <b>α</b> <i>PBD-tdTomato-URA3 BEM1-GFP-LEU2</i>                                                                                                             | Daniel Lew                 |
| DLY13038 | <b>a</b> <i>CDC24-GFP-TRP1 BEM1-tdTomato-HIS3</i>                                                                                                           | Daniel Lew                 |
| HPY3349  | <b>a/α</b> <i>CDC24-GFP-TRP1/CDC24-GFP-TRP1 BEM1-tdTomato-HIS3/BEM1-tdTomato-HIS3</i>                                                                       | This Study                 |
| HPY3367  | <b>a/α</b> <i>rsr1Δ::URA3/rsr1Δ::URA3 BEM1-tdTomato-HIS3/BEM1-tdTomato-HIS3 CDC24-GFP-LEU2/CDC24-GFP-LEU2</i>                                               | This Study                 |
| HPY3370  | <b>a/α</b> <i>rsr1Δ::URA3/rsr1Δ::URA3 rsr1<sup>K16N</sup>-TRP1/rsr1<sup>K16N</sup>-TRP1 BEM1-tdTomato-HIS3/BEM1-tdTomato-HIS3 WHI5-GFP-KAN/WHI5-GFP-KAN</i> | This Study <sup>d, e</sup> |
| HPY3342  | <b>α</b> <i>rsr1Δ::URA3 rsr1<sup>K16N</sup>-TRP1 BEM1-GFP-LEU2 WHI5-mCherry-hph</i>                                                                         | This Study <sup>c, e</sup> |
| HPY3426  | <b>a</b> <i>GFP-SEC4-URA3 WHI5-mCherry-hph</i>                                                                                                              | This Study <sup>c</sup>    |
| HPY3427  | <b>α</b> <i>rsr1Δ::TRP1 GFP-SEC4-URA3 WHI5-mCherry-hph</i>                                                                                                  | This Study <sup>e</sup>    |
| HPY3430  | <b>a</b> <i>rsr1Δ::URA3 rsr1<sup>K16N</sup>-TRP GFP-SEC4-URA3 WHI5-mCherry-hph</i>                                                                          | This Study <sup>c, e</sup> |
| HPY3319  | <b>a</b> <i>BEM1-tdTomato-HIS3 WHI5-GFP-TRP1</i>                                                                                                            | This Study <sup>d</sup>    |
| HPY3461  | <b>α</b> <i>EXO70-tdTomato-KAN WHI5-GFP-TRP1</i>                                                                                                            | This Study <sup>d</sup>    |
| HPY3473  | <b>a</b> <i>BEM1-YFP<sup>N</sup>-URA3 EXO70-VC-KAN</i>                                                                                                      | This Study <sup>f</sup>    |
| HPY3483  | <b>a</b> <i>BEM1-YFP<sup>N</sup>-URA3 CDC24-VC-KAN</i>                                                                                                      | This Study <sup>f</sup>    |
| HPY3368  | <b>a</b> <i>rsr1Δ::URA3 rsr1<sup>K16N</sup>-TRP1 WHI5-GFP-KAN BEM1-tdTomato-HIS3</i>                                                                        | This Study <sup>d, e</sup> |
| HPY3347  | <b>a</b> <i>rsr1Δ::URA3 CDC24-GFP-TRP1 BEM1-tdTomato-HIS3</i>                                                                                               | This Study                 |
| HPY3380  | <b>a/α</b> <i>BEM1-tdTomato-HIS3/BEM1-tdTomato-HIS3 WHI5-GFP-TRP1/WHI5-GFP-TRP1</i>                                                                         | This Study <sup>d</sup>    |
| HPY3231  | <b>a/α</b> <i>WHI5-mCherry-hph/WHI5-mCherry-hph CDC24-GFP-TRP1/CDC24-GFP-TRP1</i>                                                                           | This Study <sup>c</sup>    |
| HPY3467  | <b>a/α</b> <i>rsr1Δ::URA3/rsr1Δ::URA3 BEM1-tdTomato-HIS3/BEM1-tdTomato-HIS3 WHI5-GFP-TRP1/WHI5-GFP-TRP1</i>                                                 | This Study <sup>d</sup>    |
| HPY3336  | <b>a</b> <i>BEM1-tdTomato-HIS3</i>                                                                                                                          | This Study                 |
| HPY3480  | <b>a/α</b> <i>YFP<sup>C</sup>-rsr1<sup>G12V</sup>-TRP1/YFP<sup>C</sup>-rsr1<sup>G12V</sup>-TRP1 BEM1-YFP<sup>N</sup>-URA3/BEM1-YFP<sup>N</sup>-URA3</i>     | This Study <sup>b</sup>    |
| HPY3482  | <b>a/α</b> <i>YFP<sup>C</sup>-rsr1<sup>K16N</sup>-TRP1/YFP<sup>C</sup>-rsr1<sup>K16N</sup>-TRP1 BEM1-YFP<sup>N</sup>-URA3/BEM1-YFP<sup>N</sup>-URA3</i>     | This Study <sup>b</sup>    |

<sup>a</sup> All strains are congenic to YEF473A. The original strains and plasmids expressing Gic2-PBD-tdTomato were previously described (Tong *et al.*, 2007) (kind gifts from E. Bi, University of Pennsylvania). The original strains and plasmids expressing Bem1-GFP (Kozubowski *et al.*, 2008), Bem1-tdTomato (Howell *et*

*al.*, 2012), and GFP-Sec4 (Chen *et al.*, 2012) were previously described (gifts from D. Lew, Duke University).

<sup>b</sup> pRS306 plasmid carrying BEM1-YFP<sup>N</sup> or *bem1*<sup>Δ281-345</sup>-YFP<sup>N</sup> or *bem1*<sup>Δ345-408</sup>-YFP<sup>N</sup> was linearized with *StuI* and integrated at the *ura3* locus.

<sup>c</sup> *WHI5-mCherry* was constructed by the C-terminal tagging method described in Longtine *et al.* (1998) using pBS35 (mCherry, hygromycin-B selection; a gift from Yeast Resource Center, University of Washington, Seattle, WA), replacing the endogenous *WHI5* (Miller *et al.*, 2017).

<sup>d</sup> *WHI5-GFP* was constructed by the C-terminal tagging method described in Longtine *et al.*, (1998), using pFA6a-GFP-TRP1 or pFA6a-GFP-kanMX6 replacing the endogenous *WHI5* (Kang *et al.*, 2014).

<sup>e</sup> *rsr1*<sup>K16N</sup>-TRP1 contains a YFP tag at the N terminus (Park *et al.*, 2002). Since the GFP signal was much stronger than YFP, exposure time was set so that no YFP signal was detectable in images.

<sup>f</sup> *EXO70-VC* and *CDC24-VC* were constructed by the PCR-based C-terminal tagging method (Longtine *et al.*, 1998) using HP0038 pFA6a-VC-kanMX6 (Sung *et al.*, 2007) (a kind gift of W-K Huh, Seoul National University)

**Table S2. Plasmids used in this study**

| Plasmid | Description                                                                                                                                                               | Source                        |
|---------|---------------------------------------------------------------------------------------------------------------------------------------------------------------------------|-------------------------------|
| pHP2238 | pRS426-BEM1-YFP <sup>N</sup> , 2μ, <i>URA3</i> , carrying the complete ORF of <i>BEM1</i> with 217bp upstream and 268bp downstream.                                       | This Study                    |
| pHP2239 | pRS426- <i>bem1</i> <sup>Δ1-147</sup> -YFP <sup>N</sup> , 2μ, <i>URA3</i> , the same as pRS426-BEM1-YFP <sup>N</sup> except carrying a deletion of aa1-147.               | This Study                    |
| pHP2240 | pRS426- <i>bem1</i> <sup>Δ148-280</sup> -YFP <sup>N</sup> , 2μ, <i>URA3</i> , the same as pRS426-BEM1-YFP <sup>N</sup> except carrying a deletion of aa148-280.           | This Study                    |
| pHP2247 | pRS426- <i>bem1</i> <sup>K482A</sup> -YFP <sup>N</sup> , 2μ, <i>URA3</i> , the same as pRS426-BEM1-YFP <sup>N</sup> except carrying the mutation K482A in the PB1 domain. | This Study                    |
| pHP2248 | pRS426- <i>bem1</i> <sup>Δ412-551</sup> -YFP <sup>N</sup> , 2μ, <i>URA3</i> , the same as pRS426-BEM1-YFP <sup>N</sup> except carrying a deletion of aa412-551.           | This Study                    |
| pHP2253 | pRS306-BEM1-YFP <sup>N</sup> , integrative, <i>URA3</i> , carrying the complete ORF of <i>BEM1</i> with 217bp upstream and 268bp downstream.                              | This Study                    |
| pHP2254 | pRS306- <i>bem1</i> <sup>Δ281-345</sup> -YFP <sup>N</sup> , integrative, <i>URA3</i> , the same as pRS306-BEM1-YFP <sup>N</sup> except carrying a deletion of aa281-345.  | This Study                    |
| pHP2255 | pRS306- <i>bem1</i> <sup>Δ345-408</sup> -YFP <sup>N</sup> , integrative, <i>URA3</i> , the same as pRS306-BEM1-YFP <sup>N</sup> except carrying a deletion of aa345-408.  | This Study                    |
| pHP744  | YEp13, 2μ, <i>LEU2</i>                                                                                                                                                    | Broach <i>et al.</i> , 1979   |
| PB268   | YEp13-RSR1 <sup>K16N</sup> , 2μ, <i>LEU2</i> , carrying the complete ORF of <i>RSR1</i> with the K16N mutation                                                            | Ruggieri <i>et al.</i> , 1992 |
| HP0038  | pFA6a-VC-kanMX6                                                                                                                                                           | Sung <i>et al.</i> , 2007     |
| pRS4    | pGEX-RSR1                                                                                                                                                                 | Park <i>et al.</i> , 1997     |
| pHP610  | pTrcHisA-BEM1(aa44-551)                                                                                                                                                   | Park <i>et al.</i> , 1997     |



## References

- Bi E, Pringle JR (1996) ZDS1 and ZDS2, genes whose products may regulate Cdc42p in *Saccharomyces cerevisiae*. *Mol Cell Biol* 16:5264–5275.
- Broach JR, Strathern JN, Hicks JB (1979) Transformation in yeast: development of a hybrid cloning vector and isolation of the CAN1 gene. *Gene* 8:121-133.
- Chen H, Kuo CC, Kang H, Howell AS, Zyla TR, Jin M, Lew DJ (2012) Cdc42p regulation of the yeast formin Bni1p mediated by the effector Gic2p. *Mol Biol Cell* 23:3814–3826.
- Howell AS, Jin M, Wu CF, Zyla TR, Elston TC, Lew DJ (2012) Negative feedback enhances robustness in the yeast polarity establishment circuit. *Cell* 149:322–333.
- Kang PJ, Beven L, Hariharan S, Park H-O (2010) The Rsr1/Bud1 GTPase Interacts with Itself and the Cdc42 GTPase during Bud-Site Selection and Polarity Establishment in Budding Yeast. *Mol Biol Cell* 21:3007–3016.
- Kang PJ, Lee ME, Park HO (2014) Bud3 activates Cdc42 to establish a proper growth site in budding yeast. *J Cell Biol* 206:19–28.
- Kozubowski L, Saito K, Johnson JM, Howell AS, Zyla TR, Lew DJ (2008) Symmetry-breaking polarization driven by a Cdc42p GEF-PAK complex. *Curr Biol* 18:1719–1726.
- Lee ME, Lo W-C, Miller KE, Chou C-S, Park H-O (2015) Regulation of Cdc42 polarization by the Rsr1 GTPase and Rga1, a Cdc42 GTPase-activating protein, in budding yeast. *J Cell Sci* 128:2106–2117.
- Longtine MS, McKenzie AIII, Demarini DJ, Shah NG, Wach A, Brachat A, Philippsen P, Pringle JR (1998) Additional modules for versatile and economical PCR-based gene deletion and modification in *Saccharomyces cerevisiae*. *Yeast* 14:953–961.
- Miller KE, Lo W-C, Lee ME, Kang PJ, Park H-O (2017) Fine-tuning the orientation of the polarity axis by Rga1, a Cdc42 GTPase-activating protein. *Mol Biol Cell*. 28: 3773-3788.
- Park H-O, Bi E, Pringle JR, Herskowitz I (1997) Two active states of the Ras-related Bud1/Rsr1 protein bind to different effectors to determine yeast cell polarity. *Proc Natl Acad Sci USA* 94:4463–4468.
- Park H-O, Kang PJ, Rachfal AW (2002) Localization of the Rsr1/Bud1 GTPase involved in selection of a proper growth site in yeast. *J Biol Chem* 277:26721–26724.
- Ruggieri R, Bender A, Matsui Y, Powers S, Takai Y, Pringle JR, Matsumoto K (1992) RSR1, a ras-like gene homologous to Krev-1 (smg21A/rap1A): role in the development of cell polarity and interactions with the Ras pathway in *Saccharomyces cerevisiae*. *Mol Cell Biol* 12:758–766.
- Sung MK, Huh WK (2007) Bimolecular fluorescence complementation analysis system for in vivo detection of protein-protein interaction in *Saccharomyces cerevisiae*. *Yeast* 24:767–775.
- Tong Z, Gao X-D, Howell AS, Bose I, Lew DJ, Bi E (2007) Adjacent positioning of cellular structures enabled by a Cdc42 GTPase-activating protein mediated zone of inhibition. *J Cell Biol* 179:1375–1384.

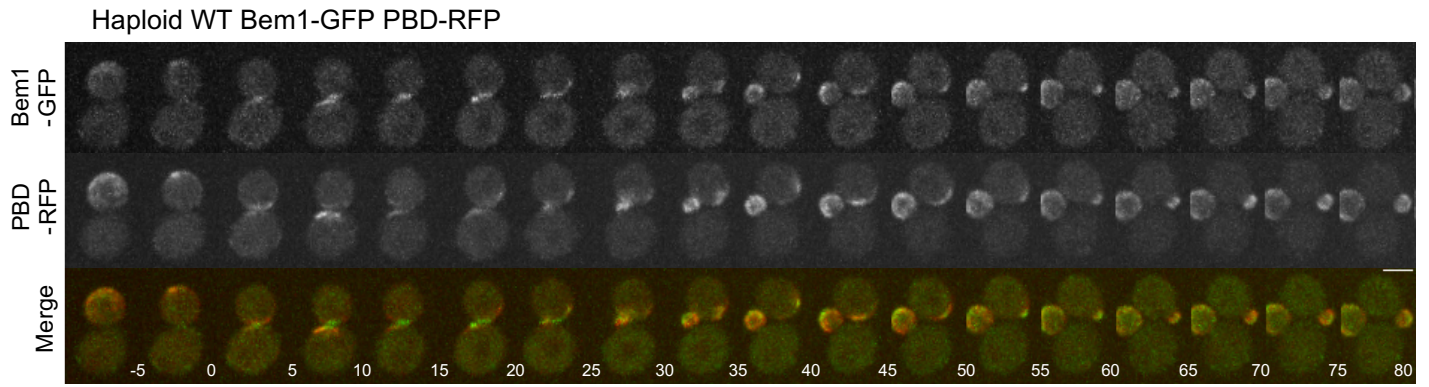

**Fig. S1. Time-lapse images of Bem1-GFP and PBD-RFP in haploid WT cells at 30°C.** Numbers indicate time (min) relative to the onset of cytokinesis ( $t=0$ ). Bars, 3  $\mu\text{m}$ .

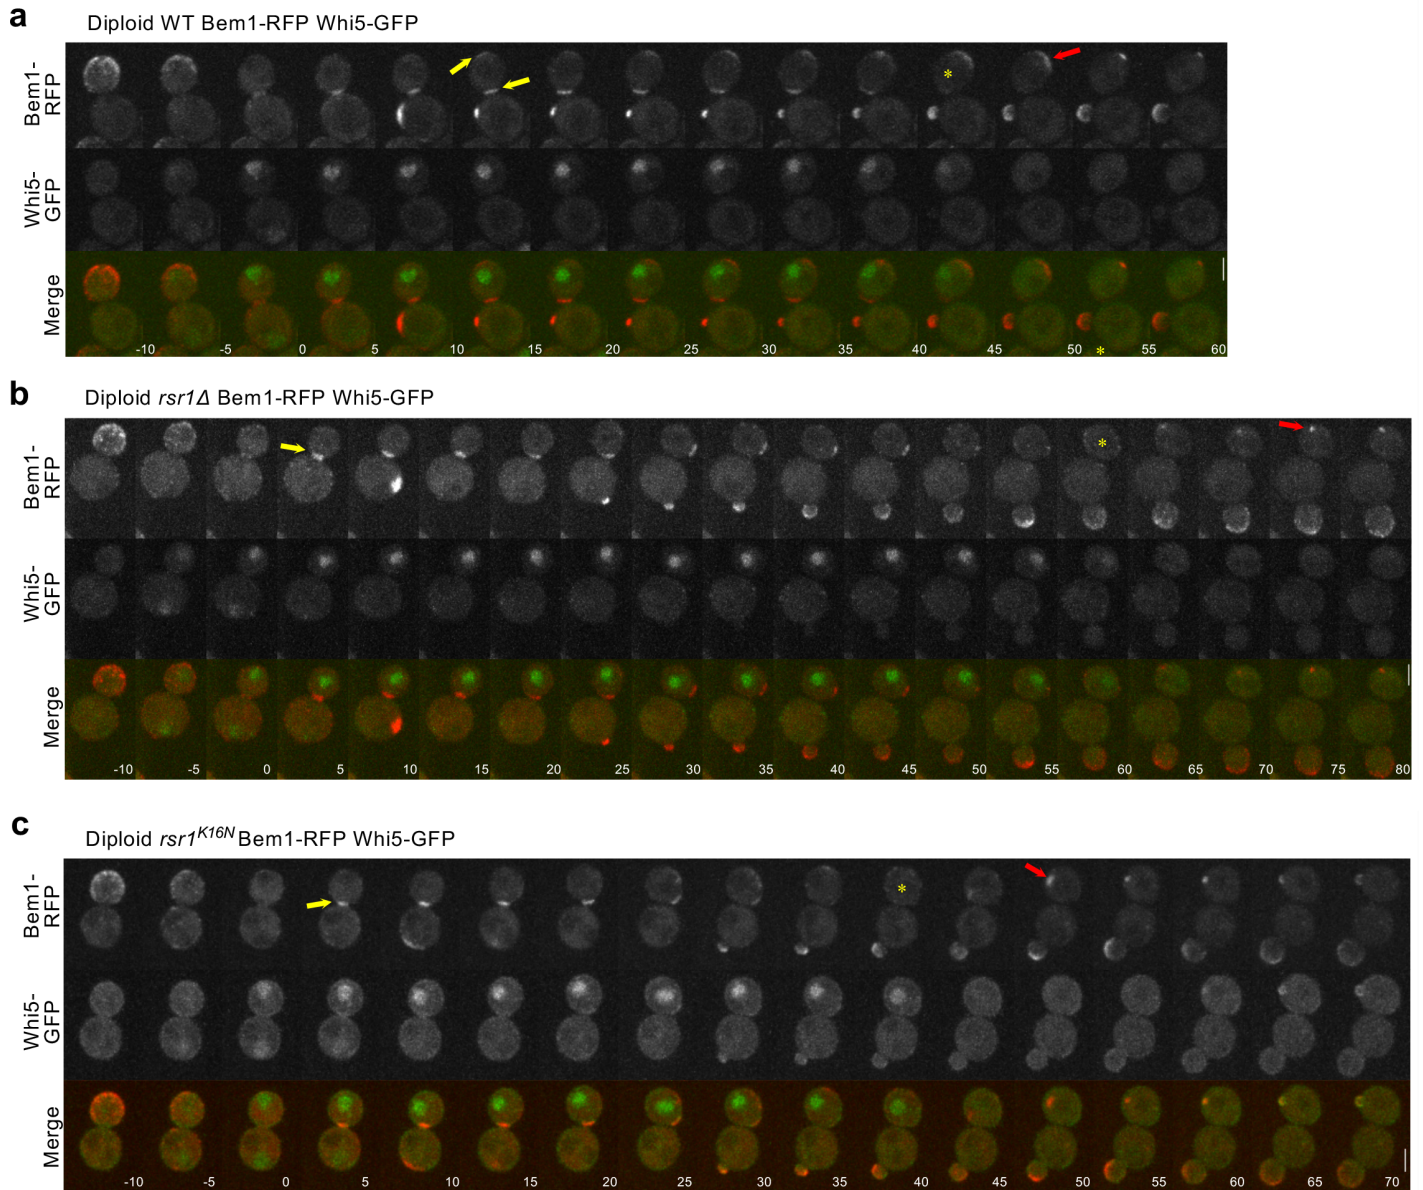

**Fig. S2. Localization of Bem1-RFP and Whi5-GFP in diploid WT and *rsr1* mutant cells.** Time-lapse images of Bem1-RFP and Whi5-GFP in (a) *WT*, (b) *rsr1Δ*, and (c) *rsr1<sup>K16N</sup>* cells at 22°C. Numbers indicate time (min) relative to the onset of cytokinesis ( $t=0$ ). Asterisks mark the T<sub>1</sub>-T<sub>2</sub> transition in daughter cells. Yellow and red arrows mark localized Bem1-RFP signal during T<sub>1</sub> and at the incipient bud site during T<sub>2</sub>, respectively. Bars, 3 μm.

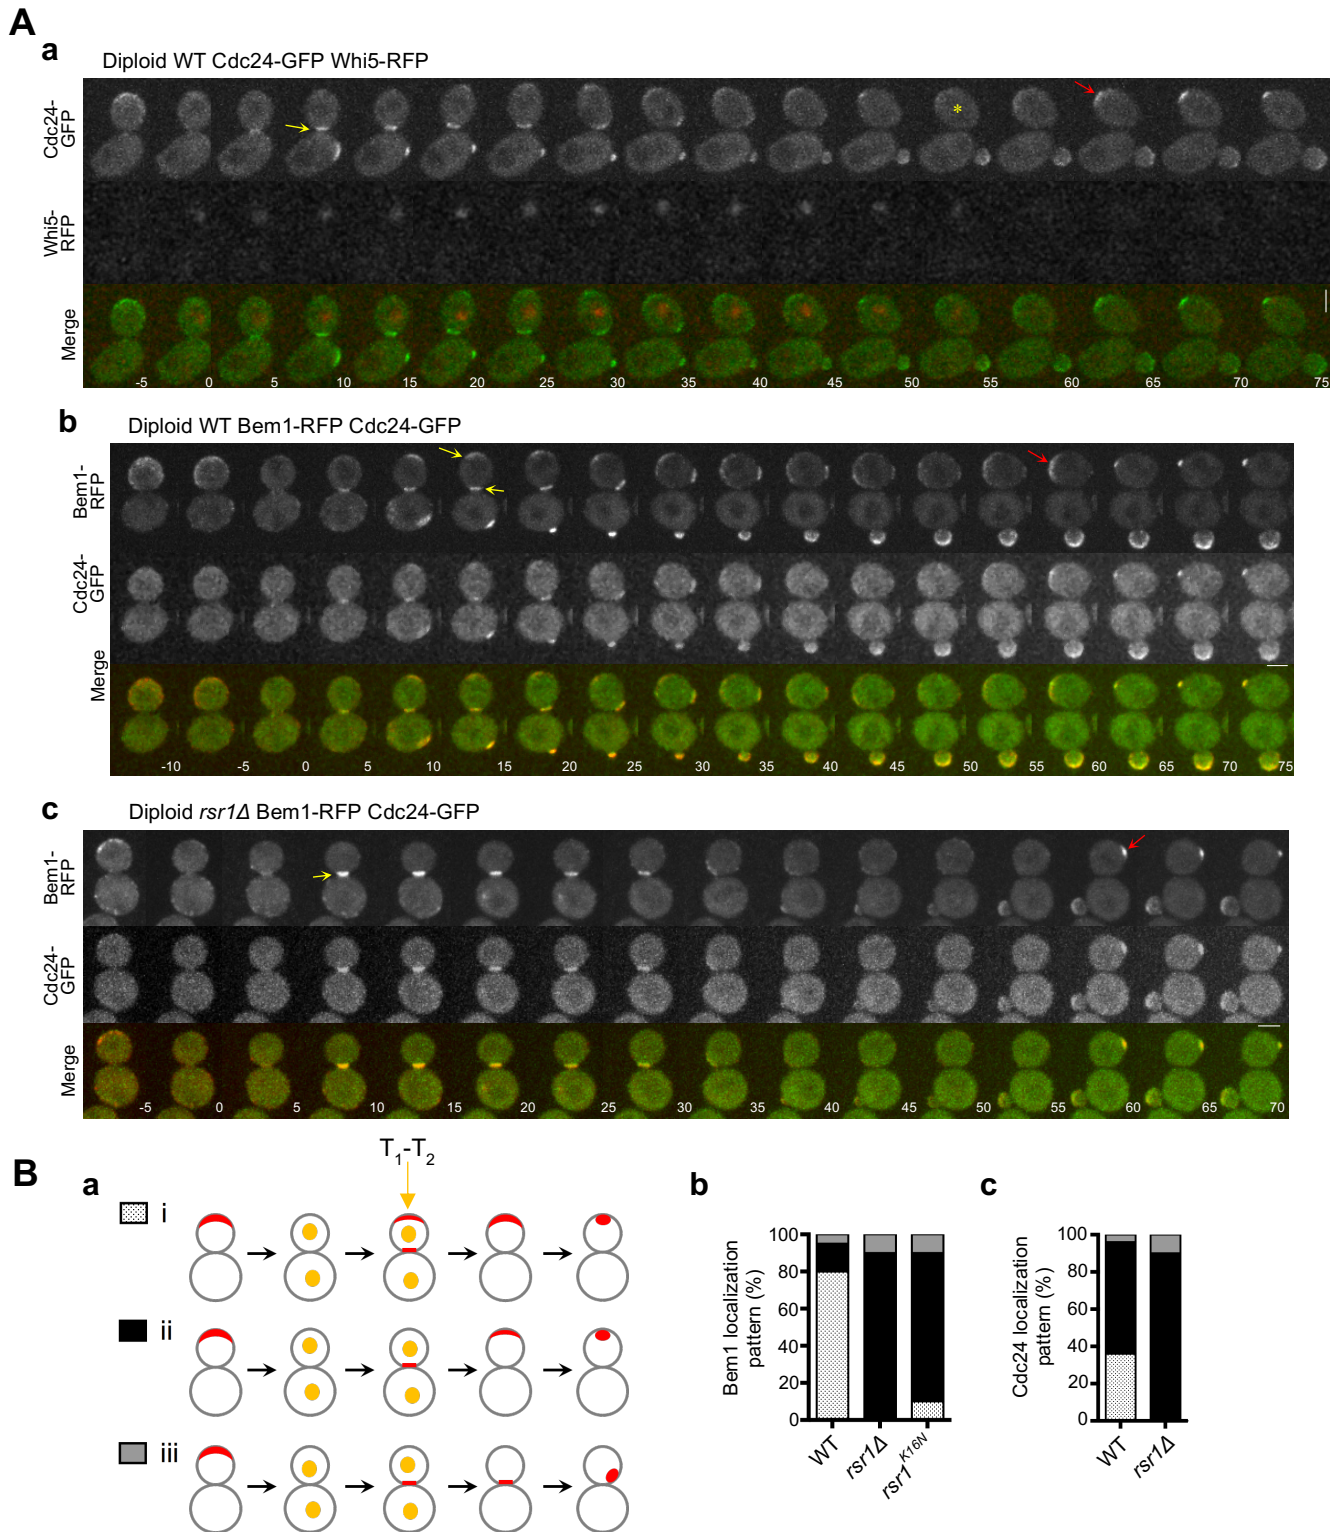

**Fig. S3. Localization of Bem1-RFP and Cdc24-GFP Bem1 in diploid WT and *rsr1* cells.** (A) Time-lapse images of (a) Cdc24-GFP and Whi5-RFP in WT cells; and Bem1-RFP and Cdc24-GFP in (b) WT and (c) *rsr1Δ* cells at 22°C. Numbers indicate time (min) relative to the onset of cytokinesis ( $t=0$ ). An asterisk in (a) marks the  $T_1$ - $T_2$  transition in the daughter cell. Yellow and red arrows mark localized Cdc24 or Bem1 signals during  $T_1$  and at the incipient bud site during  $T_2$ , respectively (a-c). Bars, 3  $\mu$ m. (B) Localization pattern (%) of Bem1 (b) or Cdc24 (c), marked in red in (a), during  $T_1$  and  $T_2$  (Whi5 in yellow) in daughter cells is summarized from time-lapse images of WT ( $n=45$ ), *rsr1<sup>K16N</sup>* ( $n=10$ ), and *rsr1Δ* cells ( $n=20$ ).



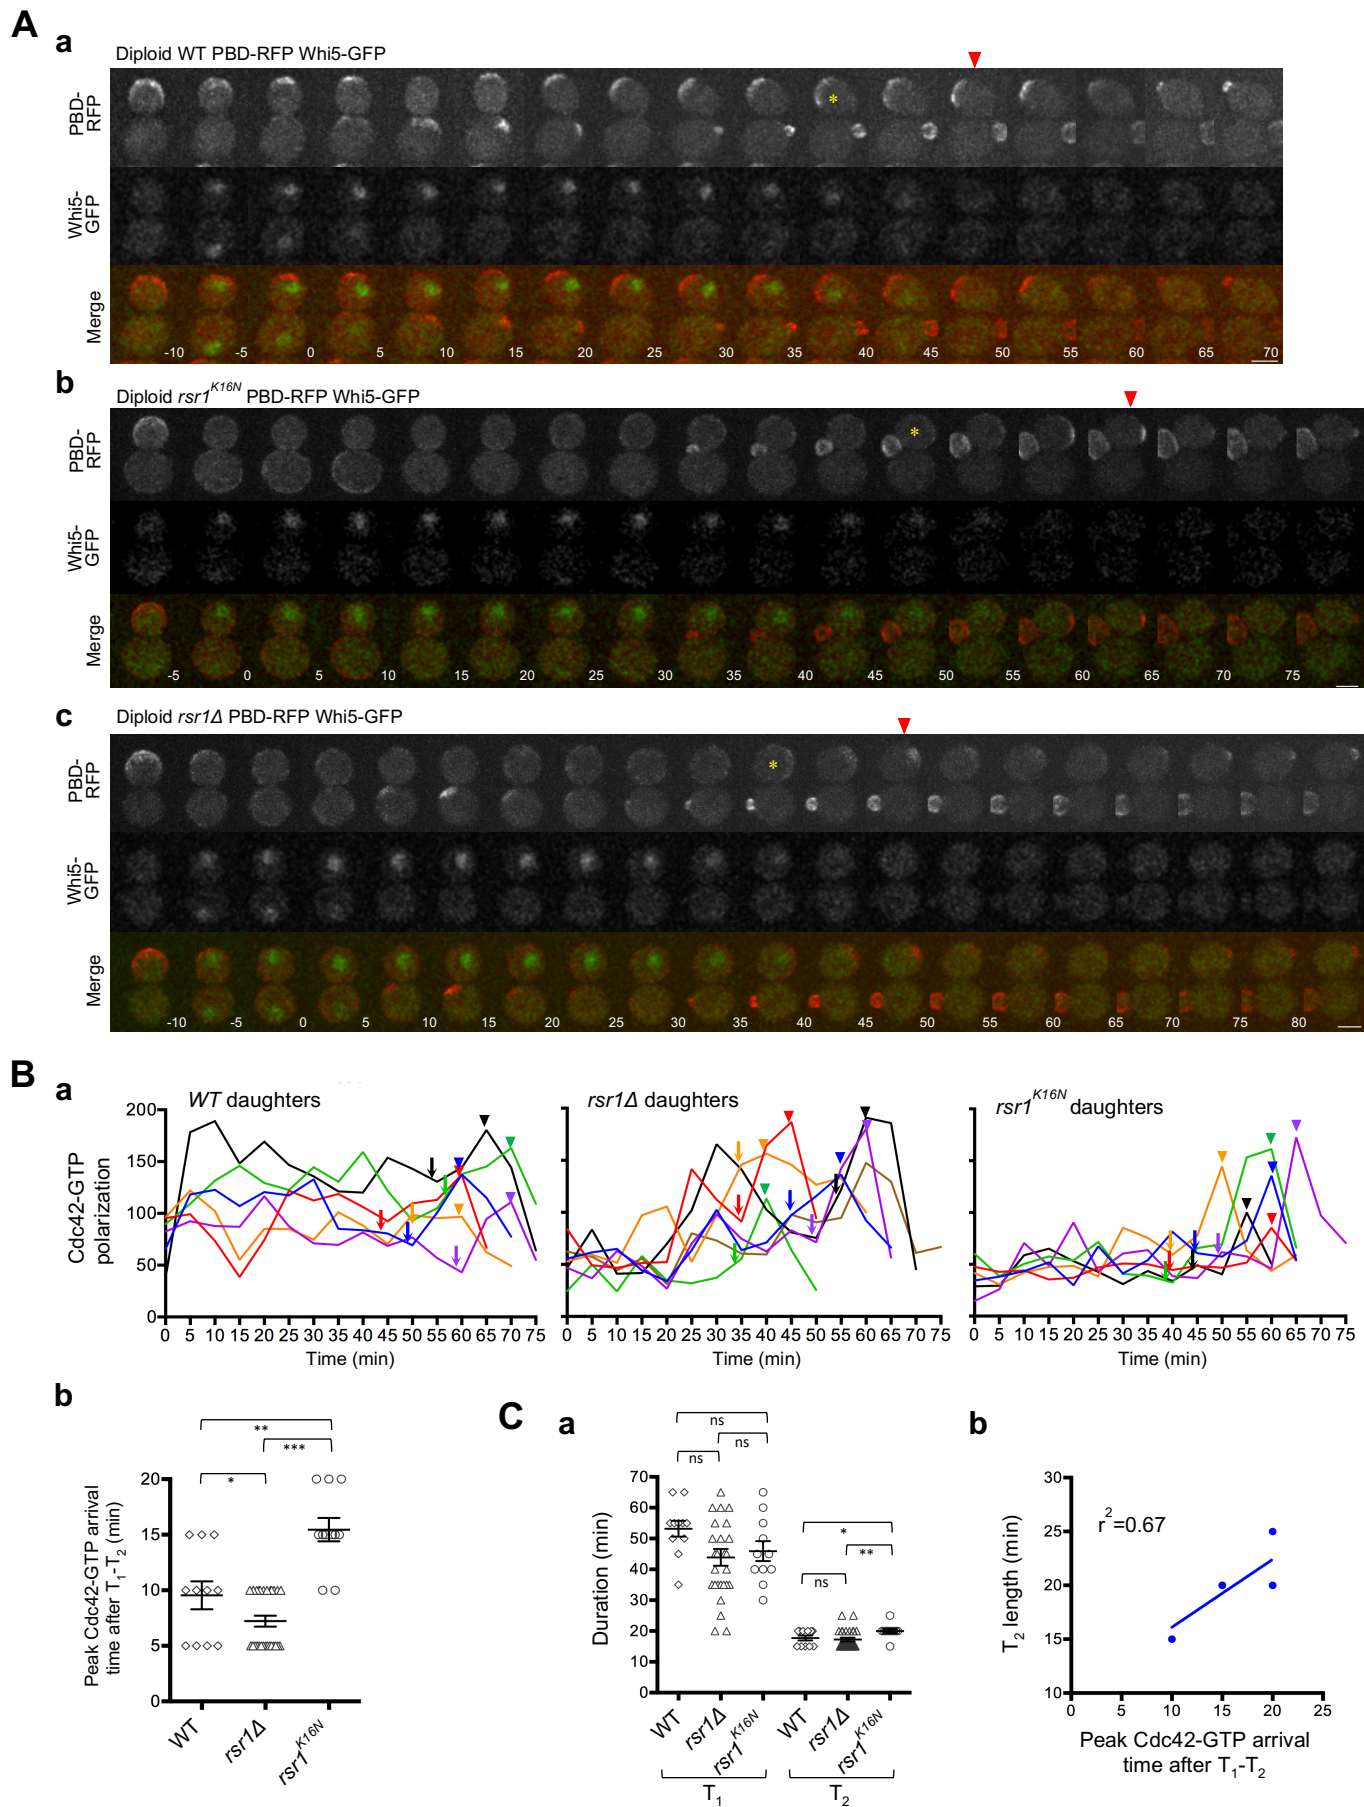

**Fig. S4. The second phase of Cdc42 polarization is delayed in diploid cells expressing GDP-locked Rsr1.** (A) Time-lapse images of PBD-RFP and Whi5-GFP in (a) WT, (b) *rsr1<sup>K16N</sup>*, and (c) *rsr1Δ* cells at 22°C.

Numbers indicate time (min) relative to the onset of cytokinesis ( $t=0$ ). Asterisks mark the  $T_1$ - $T_2$  transition in daughter cells. Bars, 3  $\mu\text{m}$ . (B) (a) Representative graphs showing Cdc42-GTP polarization over time (min) from the onset of cytokinesis ( $t=0$ ) in daughter cells. Each colored line shows Cdc42 polarization in a single daughter cell. The  $T_1$ - $T_2$  transition point and when Cdc42-GTP level peaked during  $T_2$  in each cell are marked with an arrow and an arrowhead, respectively, in the same color. (b) Quantification of the time (min) from  $T_1$ - $T_2$  transition until Cdc42-GTP reached a maximum level during  $T_2$  in WT ( $n=11$ ), *rsr1* $\Delta$  ( $n=27$ ), and *rsr1*<sup>K16N</sup> ( $n=11$ ) daughter cells. Values are shown for each individual cell. (C) (a) Length of  $T_1$  and  $T_2$  (min) in each daughter cell (WT,  $n=11$ ; *rsr1* $\Delta$ ,  $n=27$ ; and *rsr1*<sup>K16N</sup>,  $n=11$ ). (b) Correlation analysis of  $T_2$  length and peak Cdc42-GTP arrival time after the  $T_1$ - $T_2$  transition in *rsr1*<sup>K16N</sup> cells ( $n=11$ ).

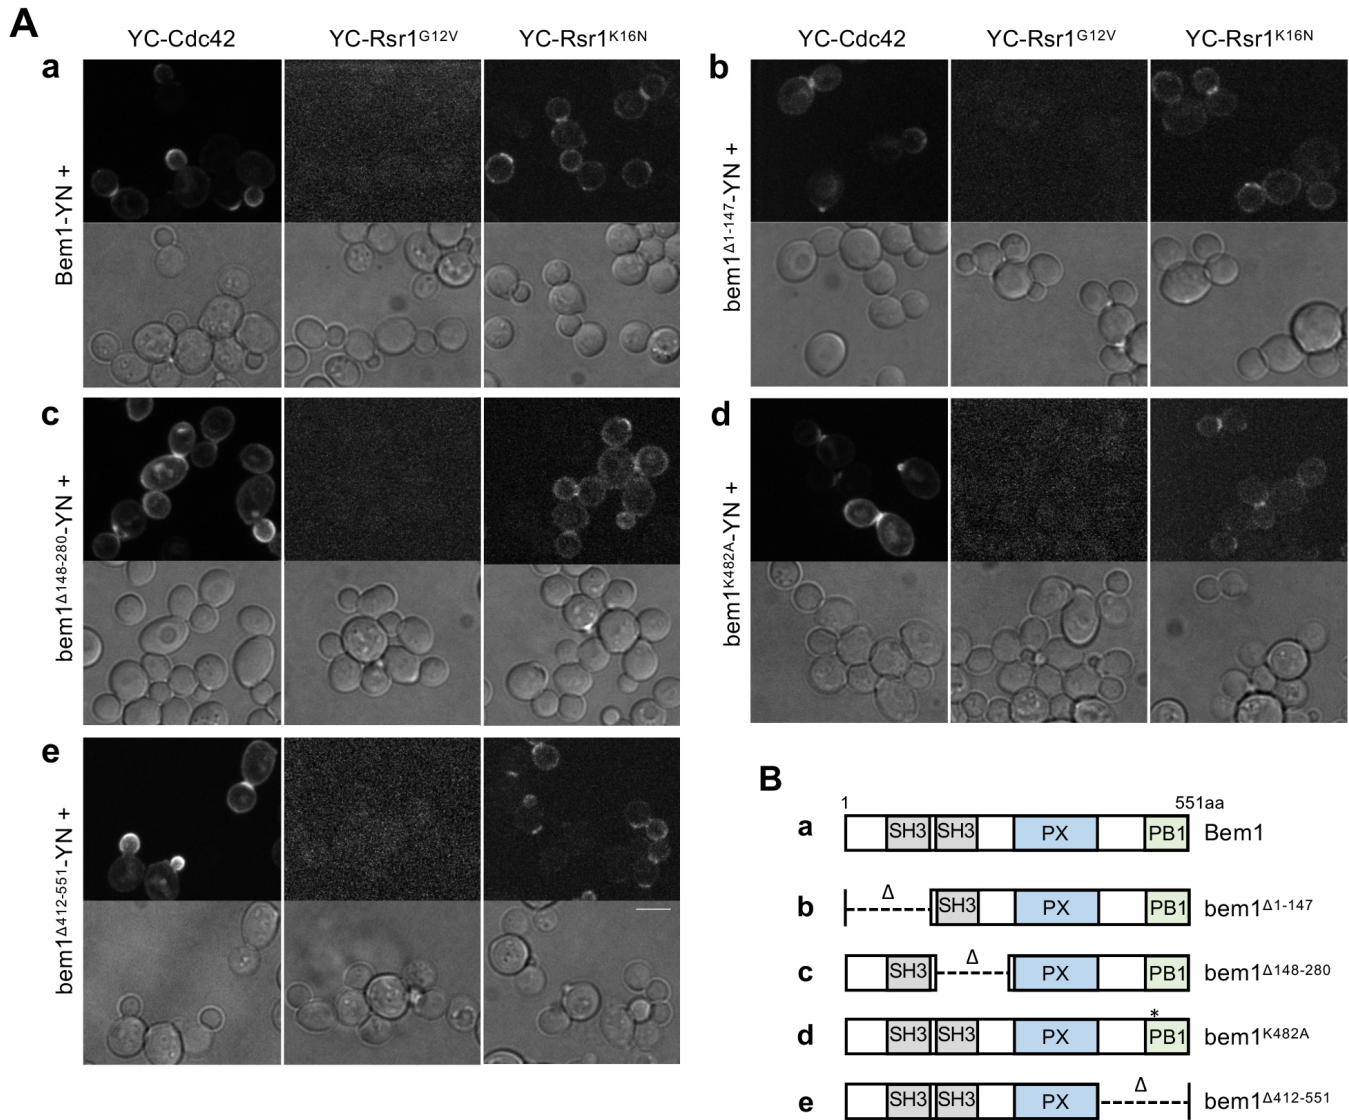

**Fig. S5. Additional BiFC assays.** (A) BiFC assays in haploid cells expressing YC-Cdc42, YC-Rsr1<sup>G12V</sup>, or YC-Rsr1<sup>K16N</sup> and carrying each multicopy plasmid for expression of WT or mutant Bem1 fused to YN, as marked. (B) Diagram of WT and mutant Bem1 proteins. Regions deleted are marked with delta ( $\Delta$ ). An asterisk (\*) marks the K482A mutation. Bars, 5 $\mu$ m.

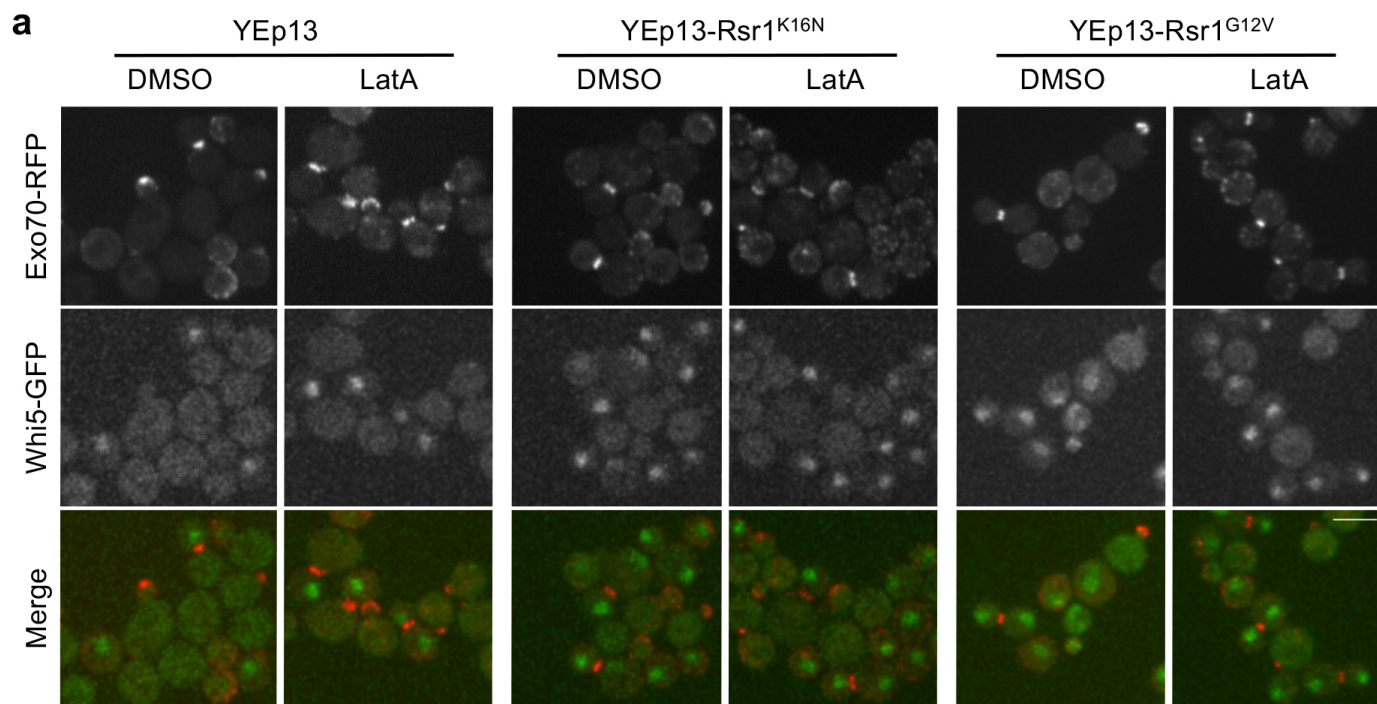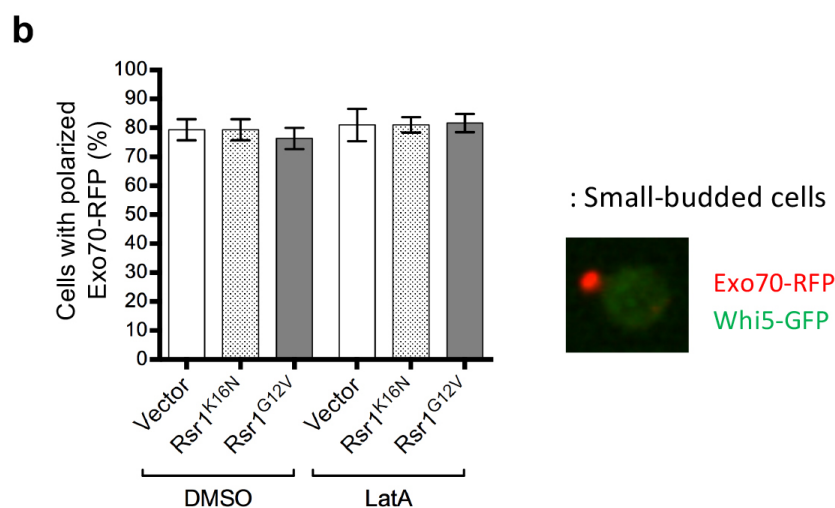

**Fig. S6. Exo70 polarization in haploid cells treated with LatA or DMSO.** (a) Images of LatA or DMSO-treated WT haploid cells expressing Exo70-RFP and Whi5-GFP and carrying each plasmid as marked. Bar 5 $\mu$ m. (b) The percentage of small-budded cells with polarized Exo70-RFP (n=100-270 for each sample per experiment). An example image of a small-budded cell expressing Exo70-RFP and Whi5-GFP is shown.



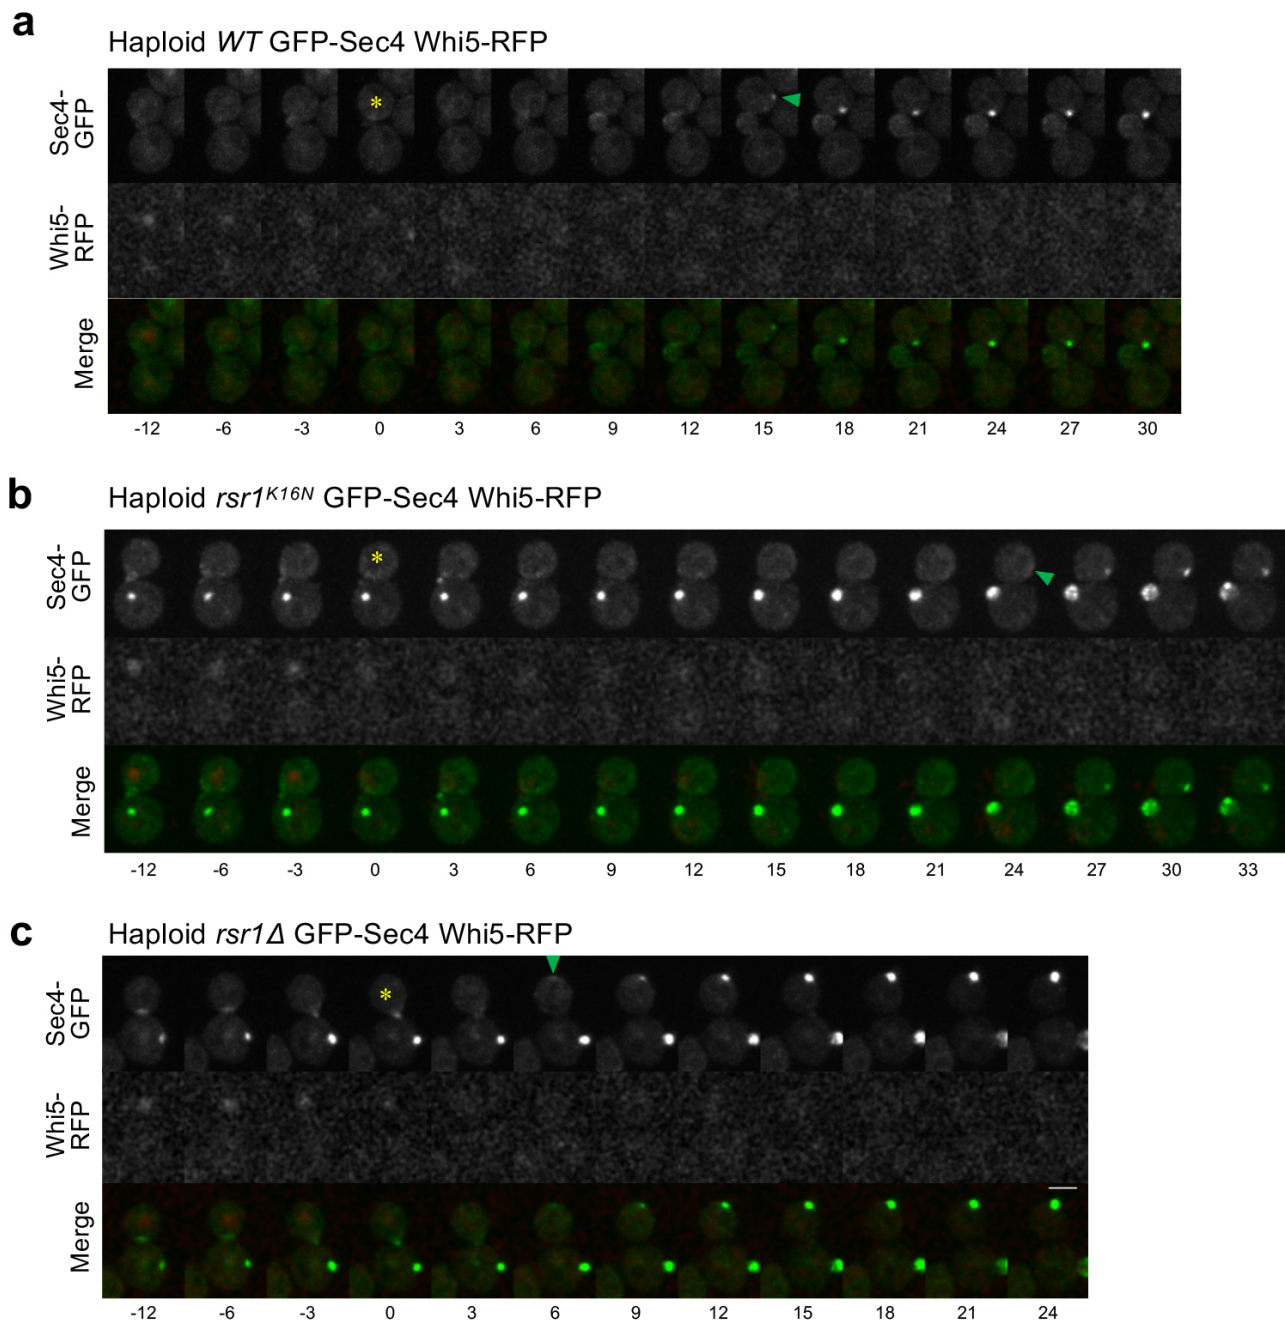

**Fig. S7. Sec4 polarization in haploid cells.** Time-lapse images of GFP-Sec4 and Whi5-RFP in (a) WT, (b) *rsr1<sup>K16N</sup>*, and (c) *rsr1Δ* cells at 30°C. Numbers indicate time (min) relative to the T<sub>1</sub>-T<sub>2</sub> transition (marked with an asterisk; t=0) in daughter cells. Green arrowheads point the first appearance of polarized GFP-Sec4. Bars, 3 μm.
